# Supplementary material
Source: PubMed Central journal article supplement (PMC6534437)
Supplement: NIHMS1525323-supplement-1.pdf [file NIHMS1525323-supplement-1.pdf]

Appendix Table 1: Observed facility use among children during 2014 and 2016 (n=169 parks); National Study of Neighborhood Parks

| Characteristic             | 2014                          |                          |                               |                          | 2016                          |                          |                               |                          |
|----------------------------|-------------------------------|--------------------------|-------------------------------|--------------------------|-------------------------------|--------------------------|-------------------------------|--------------------------|
|                            | Male Children                 |                          | Female Children               |                          | Male Children                 |                          | Female Children               |                          |
|                            | Number of Observed Park Users | % of Observed Park Users | Number of Observed Park Users | % of Observed Park Users | Number of Observed Park Users | % of Observed Park Users | Number of Observed Park Users | % of Observed Park Users |
| Overall park use           | 14,101                        |                          | 9,671                         |                          | 13,713                        |                          | 9,082                         |                          |
| Facility Type              |                               |                          |                               |                          |                               |                          |                               |                          |
| Baseball field             | 2,655                         | 18.8%                    | 511                           | 5.3%                     | 2,464                         | 18.0%                    | 755                           | 8.3%                     |
| Basketball court (outdoor) | 565                           | 4.0%                     | 117                           | 1.2%                     | 570                           | 4.2%                     | 80                            | 0.9%                     |
| Bleacher                   | 525                           | 3.7%                     | 317                           | 3.3%                     | 447                           | 3.3%                     | 303                           | 3.3%                     |
| Classroom                  | 161                           | 1.1%                     | 139                           | 1.4%                     | 121                           | 0.9%                     | 99                            | 1.1%                     |
| Gymnasium                  | 471                           | 3.3%                     | 248                           | 2.6%                     | 664                           | 4.8%                     | 271                           | 3.0%                     |
| Lawn                       | 2,082                         | 14.8%                    | 1,502                         | 15.5%                    | 1,909                         | 13.9%                    | 1,406                         | 15.5%                    |
| Multi-purpose court        | 137                           | 1.0%                     | 113                           | 1.2%                     | 83                            | 0.6%                     | 41                            | 0.5%                     |
| Picnic area                | 404                           | 2.9%                     | 309                           | 3.2%                     | 406                           | 3.0%                     | 400                           | 4.4%                     |
| Playground                 | 2,760                         | 19.6%                    | 3,041                         | 31.4%                    | 2,638                         | 19.2%                    | 2,818                         | 31.0%                    |
| Pool                       | 491                           | 3.5%                     | 477                           | 4.9%                     | 605                           | 4.4%                     | 443                           | 4.9%                     |
| Seating area               | 290                           | 2.1%                     | 237                           | 2.4%                     | 235                           | 1.7%                     | 215                           | 2.4%                     |
| Sidewalk                   | 1,354                         | 9.6%                     | 1,211                         | 12.5%                    | 1,054                         | 7.7%                     | 866                           | 9.5%                     |
| Sports field               | 971                           | 6.9%                     | 647                           | 6.7%                     | 1,613                         | 11.8%                    | 684                           | 7.5%                     |
| Tennis court               | 73                            | 0.5%                     | 42                            | 0.4%                     | 54                            | 0.4%                     | 38                            | 0.4%                     |
| Walking loop               | 364                           | 2.6%                     | 215                           | 2.2%                     | 131                           | 1.0%                     | 109                           | 1.2%                     |
| Water feature              | 410                           | 2.9%                     | 359                           | 3.7%                     | 380                           | 2.8%                     | 335                           | 3.7%                     |

Appendix Table 2: Observed facility use among teenagers during 2014 and 2016 (n=169 parks); National Study of Neighborhood Parks

| Characteristic             | 2014           |          |                  |          | 2016           |          |                  |          |
|----------------------------|----------------|----------|------------------|----------|----------------|----------|------------------|----------|
|                            | Male Teenagers |          | Female Teenagers |          | Male Teenagers |          | Female Teenagers |          |
|                            | Number of      | % of     | Number of        | % of     | Number of      | % of     | Number of        | % of     |
|                            | Observed       | Observed | Observed         | Observed | Observed       | Observed | Observed         | Observed |
| Park                       | Park           | Park     | Park             | Park     | Park           | Park     | Park             |          |
| Users                      | Users          | Users    | Users            | Users    | Users          | Users    | Users            |          |
| Overall park use           | 7,632          |          | 4,569            |          | 5,941          |          | 3,310            |          |
| Facility Type              |                |          |                  |          |                |          |                  |          |
| Baseball field             | 834            | 10.9%    | 296              | 6.5%     | 996            | 16.8%    | 417              | 12.6%    |
| Basketball court (outdoor) | 1,203          | 15.8%    | 132              | 2.9%     | 902            | 15.2%    | 105              | 3.2%     |
| Bleacher                   | 359            | 4.7%     | 246              | 5.4%     | 167            | 2.8%     | 157              | 4.7%     |
| Classroom                  | 33             | 0.4%     | 31               | 0.7%     | 52             | 0.9%     | 48               | 1.5%     |
| Gymnasium                  | 231            | 3.0%     | 110              | 2.4%     | 289            | 4.9%     | 111              | 3.4%     |
| Lawn                       | 1,264          | 16.6%    | 1,055            | 23.1%    | 783            | 13.2%    | 652              | 19.7%    |
| Multi-purpose court        | 130            | 1.7%     | 118              | 2.6%     | 54             | 0.9%     | 12               | 0.4%     |
| Picnic area                | 168            | 2.2%     | 140              | 3.1%     | 108            | 1.8%     | 134              | 4.0%     |
| Playground                 | 295            | 3.9%     | 494              | 10.8%    | 199            | 3.3%     | 320              | 9.7%     |
| Pool                       | 264            | 3.5%     | 254              | 5.6%     | 209            | 3.5%     | 257              | 7.8%     |
| Seating area               | 230            | 3.0%     | 180              | 3.9%     | 145            | 2.4%     | 87               | 2.6%     |
| Sidewalk                   | 906            | 11.9%    | 831              | 18.2%    | 503            | 8.5%     | 382              | 11.5%    |
| Sports field               | 587            | 7.7%     | 222              | 4.9%     | 794            | 13.4%    | 361              | 10.9%    |
| Tennis court               | 100            | 1.3%     | 95               | 2.1%     | 83             | 1.4%     | 35               | 1.1%     |
| Walking loop               | 136            | 1.8%     | 128              | 2.8%     | 92             | 1.5%     | 65               | 2.0%     |
| Water feature              | 41             | 0.5%     | 51               | 1.1%     | 32             | 0.5%     | 62               | 1.9%     |

Appendix Table 3: Observed facility use among adults (not including older adults) during 2014 and 2016 (n=169 parks); National Study of Neighborhood Parks

| Characteristic             | 2014                          |                          |                               |                          | 2016                          |                          |                               |                          |
|----------------------------|-------------------------------|--------------------------|-------------------------------|--------------------------|-------------------------------|--------------------------|-------------------------------|--------------------------|
|                            | Male Adults                   |                          | Female Adults                 |                          | Male Adults                   |                          | Female Adults                 |                          |
|                            | Number of Observed Park Users | % of Observed Park Users | Number of Observed Park Users | % of Observed Park Users | Number of Observed Park Users | % of Observed Park Users | Number of Observed Park Users | % of Observed Park Users |
|                            |                               |                          |                               |                          |                               |                          |                               |                          |
| Overall park use           | 19,356                        |                          | 15,483                        |                          | 19,504                        |                          | 14,842                        |                          |
| Facility Type              |                               |                          |                               |                          |                               |                          |                               |                          |
| Baseball field             | 2,328                         | 12.0%                    | 554                           | 3.6%                     | 2,494                         | 12.8%                    | 864                           | 5.8%                     |
| Basketball court (outdoor) | 1,126                         | 5.8%                     | 156                           | 1.0%                     | 977                           | 5.0%                     | 86                            | 0.6%                     |
| Bleacher                   | 1,250                         | 6.5%                     | 1,340                         | 8.7%                     | 1,098                         | 5.6%                     | 968                           | 6.5%                     |
| Classroom                  | 91                            | 0.5%                     | 213                           | 1.4%                     | 62                            | 0.3%                     | 87                            | 0.6%                     |
| Gymnasium                  | 636                           | 3.3%                     | 262                           | 1.7%                     | 657                           | 3.4%                     | 451                           | 3.0%                     |
| Lawn                       | 4,812                         | 24.9%                    | 3,724                         | 24.0%                    | 4,352                         | 22.3%                    | 3,676                         | 24.8%                    |
| Multi-purpose court        | 171                           | 0.9%                     | 278                           | 1.8%                     | 142                           | 0.7%                     | 106                           | 0.7%                     |
| Picnic area                | 856                           | 4.4%                     | 855                           | 5.5%                     | 896                           | 4.6%                     | 970                           | 6.5%                     |
| Playground                 | 817                           | 4.2%                     | 1,658                         | 10.7%                    | 942                           | 4.8%                     | 1,705                         | 11.5%                    |
| Pool                       | 376                           | 1.9%                     | 524                           | 3.4%                     | 396                           | 2.0%                     | 604                           | 4.1%                     |
| Seating area               | 589                           | 3.0%                     | 667                           | 4.3%                     | 542                           | 2.8%                     | 506                           | 3.4%                     |
| Sidewalk                   | 2,585                         | 13.4%                    | 2,967                         | 19.2%                    | 2,609                         | 13.4%                    | 2,545                         | 17.1%                    |
| Sports field               | 1,719                         | 8.9%                     | 714                           | 4.6%                     | 2,265                         | 11.6%                    | 843                           | 5.7%                     |
| Tennis court               | 410                           | 2.1%                     | 194                           | 1.3%                     | 377                           | 1.9%                     | 133                           | 0.9%                     |
| Walking loop               | 608                           | 3.1%                     | 544                           | 3.5%                     | 479                           | 2.5%                     | 502                           | 3.4%                     |
| Water feature              | 108                           | 0.6%                     | 223                           | 1.4%                     | 123                           | 0.6%                     | 271                           | 1.8%                     |

Appendix Table 4: Observed facility use among older adults during 2014 and 2016 (n=169 parks); National Study of Neighborhood Parks

| Characteristic             | 2014                          |                          |                               |                          | 2016                          |                          |                               |                          |
|----------------------------|-------------------------------|--------------------------|-------------------------------|--------------------------|-------------------------------|--------------------------|-------------------------------|--------------------------|
|                            | Male Older Adults             |                          | Female Older Adults           |                          | Male Older Adults             |                          | Female Older Adults           |                          |
|                            | Number of Observed Park Users | % of Observed Park Users | Number of Observed Park Users | % of Observed Park Users | Number of Observed Park Users | % of Observed Park Users | Number of Observed Park Users | % of Observed Park Users |
| Overall park use           | 1,835                         |                          | 1,395                         |                          | 1,602                         |                          | 1,123                         |                          |
| Facility Type              |                               |                          |                               |                          |                               |                          |                               |                          |
| Baseball field             | 54                            | 2.9%                     | 19                            | 1.4%                     | 87                            | 5.4%                     | 47                            | 4.2%                     |
| Basketball court (outdoor) | 20                            | 1.1%                     | 8                             | 0.6%                     | 29                            | 1.8%                     | 3                             | 0.3%                     |
| Bleacher                   | 166                           | 9.0%                     | 93                            | 6.7%                     | 130                           | 8.1%                     | 84                            | 7.5%                     |
| Classroom                  | 112                           | 6.1%                     | 89                            | 6.4%                     | 32                            | 2.0%                     | 77                            | 6.9%                     |
| Gymnasium                  | 22                            | 1.2%                     | 71                            | 5.1%                     | 15                            | 0.9%                     | 26                            | 2.3%                     |
| Lawn                       | 559                           | 30.4%                    | 283                           | 20.3%                    | 507                           | 31.6%                    | 244                           | 21.7%                    |
| Multi-purpose court        | 15                            | 0.8%                     | 11                            | 0.8%                     | 8                             | 0.5%                     | 6                             | 0.5%                     |
| Picnic area                | 86                            | 4.7%                     | 41                            | 2.9%                     | 82                            | 5.1%                     | 66                            | 5.9%                     |
| Playground                 | 46                            | 2.5%                     | 71                            | 5.1%                     | 43                            | 2.7%                     | 62                            | 5.5%                     |
| Pool                       | 13                            | 0.7%                     | 23                            | 1.6%                     | 12                            | 0.7%                     | 33                            | 2.9%                     |
| Seating area               | 93                            | 5.1%                     | 152                           | 10.9%                    | 61                            | 3.8%                     | 47                            | 4.2%                     |
| Sidewalk                   | 369                           | 20.1%                    | 379                           | 27.1%                    | 259                           | 16.2%                    | 216                           | 19.2%                    |
| Sports field               | 51                            | 2.8%                     | 39                            | 2.8%                     | 87                            | 5.4%                     | 52                            | 4.6%                     |
| Tennis court               | 48                            | 2.6%                     | 11                            | 0.8%                     | 62                            | 3.9%                     | 12                            | 1.1%                     |
| Walking loop               | 135                           | 7.4%                     | 67                            | 4.8%                     | 112                           | 7.0%                     | 75                            | 6.7%                     |
| Water feature              | 9                             | 0.5%                     | 6                             | 0.4%                     | 11                            | 0.7%                     | 12                            | 1.1%                     |
